# Supplementary material for: Unravelling Chlamydia trachomatis Diversity in Amhara, Ethiopia: MLVA-ompA Sequencing as a Molecular Typing Tool for Trachoma
Source: bioRxiv or medRxiv preprint supplement (doi:10.1101/2024.02.04.24302064), 2024-02-07
Supplement: Supplementary file [file media-2.pdf]

| ID         | Age | sex_sv    | elembod_count | survey_ind | TFgott      | Tigott     |
|------------|-----|-----------|---------------|------------|-------------|------------|
| 1459-6700  | 1-3 | 2. Female | 219.8313904   | 2          | 40.625      | 18.76      |
| 1524-7024  | 4-5 | 2. Female | 156.2561951   | 2          | 33.33333333 | 22.2322222 |
| 1541-7108  | 4-5 | 2. Female | 37.98825073   | 2          | 36.8421053  | 3.51877193 |
| 1548-7144  | 4-5 | 1. Male   | 25.71686745   | 2          | 13.4615385  | 1.93307692 |
| 1557-7190  | 4-5 | 1. Male   | 9.602944374   | 2          | 36.8421053  | 3.51877193 |
| 1560-7203  | 1-3 | 1. Male   | 14.74954987   | 2          | 33.33333333 | 22.2322222 |
| 1612-7464  | 4-5 | 1. Male   | 29.19330406   | 2          | 41.4634146  | 14.6441463 |
| 1614-7470  | 4-5 | 2. Female | 30.3547287    | 2          | 61.4285714  | 10.01      |
| 1620-7502  | 4-5 | 1. Male   | 2914.547363   | 2          | 43.2432432  | 24.3343243 |
| 1621-7508  | 1-3 | 2. Female | 61.86403656   | 2          | 43.2432432  | 24.3343243 |
| 1623-7515  | 4-5 | 1. Male   | 122.4454803   | 2          | 43.2432432  | 24.3343243 |
| 1623-7519  | 1-3 | 1. Male   | 2517.877441   | 2          | 43.2432432  | 24.3343243 |
| 1629-7546  | 4-5 | 1. Male   | 85.35303497   | 2          | 15.2542373  | 11.8744068 |
| 1630-7550  | 4-5 | 1. Male   | 781.1620483   | 2          | 30.7692308  | 2.57410256 |
| 1633-7568  | 1-3 | 1. Male   | 1738.100586   | 2          | 30.7692308  | 2.57410256 |
| 1641-7605  | 4-5 | 2. Female | 14.74954987   | 2          | 61.4285714  | 10.01      |
| 1647-7637  | 4-5 | 1. Male   | 5.616121292   | 2          | 43.2432432  | 24.3343243 |
| 1655-7675  | 1-3 | 2. Female | 3.728496075   | 2          | 41.6666667  | 2.09333333 |
| 1658-7694  | 4-5 | 1. Male   | 288.8626709   | 2          | 25.4237288  | 18.6540678 |
| 1667-7738  | 4-5 | 2. Female | 58.91953278   | 2          | 66.6666667  | 0.01       |
| 1675-7776  | 4-5 | 1. Male   | 78.9464798    | 2          | 59.2592593  | 14.8248148 |
| 1680-7799  | 1-3 | 2. Female | 23.55570984   | 2          | 44.6428571  | 33.9385714 |
| 1682-7810  | 4-5 | 2. Female | 131.097229    | 2          | 44.6428571  | 33.9385714 |
| 1689-7847  | 1-3 | 1. Male   | 781.1620483   | 2          | 83.3333333  | 0.01       |
| 1701-7907  | 1-3 | NA        | 5.726747513   | 2          | 83.3333333  | 0.01       |
| 1708-7939  | 4-5 | 2. Female | 3.516568184   | 2          | 59.2592593  | 14.8248148 |
| 1767-8232  | 4-5 | 1. Male   | 29.47941971   | 2          | 58.6956522  | 36.9665217 |
| 1773-8261  | 4-5 | 2. Female | 167.296936    | 2          | 61.8181818  | 5.46454546 |
| 1797-8381  | 1-3 | 2. Female | 154359.625    | 2          | 39.2857143  | 17.8671429 |
| 1801-8400  | 4-5 | 2. Female | 357.9963989   | 2          | 58.6956522  | 36.9665217 |
| 1805-8424  | 1-3 | 2. Female | 312.3040466   | 2          | 58.6956522  | 36.9665217 |
| 1857-8680  | 4-5 | 2. Female | 33.79247284   | 2          | 76.9230769  | 35.9074359 |
| 1859-8691  | 4-5 | 1. Male   | 61.26358414   | 2          | 76.9230769  | 35.9074359 |
| 1878-8783  | 4-5 | 1. Male   | 48.00737      | 2          | 37.7777778  | 17.7877778 |
| 1879-8790  | 4-5 | 2. Female | 36.89281845   | 2          | 76.9230769  | 35.9074359 |
| 1889-8840  | 4-5 | 2. Female | 17.07321358   | 2          | 29.4117647  | 11.7747059 |
| 1890-8842  | 4-5 | 1. Male   | 7.5250597     | 2          | 29.4117647  | 11.7747059 |
| 1897-8878  | 4-5 | 1. Male   | 4.804675579   | 2          | 76.9230769  | 35.9074359 |
| 1899-8888  | 1-3 | 1. Male   | 560.6922607   | 2          | 76.9230769  | 35.9074359 |
| 2134-9948  | 1-3 | 2. Female | 1199.817627   | 5          | 60.7843137  | 5.89235294 |
| 2135-9954  | 4-5 | 2. Female | 913.0899048   | 5          | 60.7843137  | 5.89235294 |
| 2136-9960  | 4-5 | 2. Female | 688.1386108   | 5          | 67.6470588  | 41.1864706 |
| 2137-9963  | 1-3 | 2. Female | 27.00206947   | 5          | 67.6470588  | 41.1864706 |
| 2140-9981  | 1-3 | 1. Male   | 10.0828476    | 5          | 67.6470588  | 41.1864706 |
| 2148-10018 | 1-3 | 2. Female | 10.18167114   | 5          | 43.8596491  | 1.76438597 |

|            |     |           |             |   |            |             |
|------------|-----|-----------|-------------|---|------------|-------------|
| 2148-10019 | 1-3 | 2. Female | 249.5484467 | 5 | 32.2580645 | 16.1390323  |
| 2149-10022 | 1-3 | 2. Female | 28.62936401 | 5 | 32.2580645 | 16.1390323  |
| 2150-10027 | 4-5 | 2. Female | 7.5250597   | 5 | 46.6666667 | 20.01       |
| 2166-10106 | 4-5 | 1. Male   | 2775.825439 | 5 | 38.4615385 | 0.01        |
| 2168-10116 | 4-5 | 2. Female | 3.656471014 | 5 | 62.5       | 2.51        |
| 2169-10121 | 1-3 | 1. Male   | 2196.511719 | 5 | 62.5       | 2.51        |
| 2174-10146 | 4-5 | 1. Male   | 14.0475235  | 5 | 62.5       | 2.51        |
| 2175-10149 | 1-3 | 1. Male   | 5.507632256 | 5 | 62.5       | 2.51        |
| 2175-10151 | 1-3 | 1. Male   | 4.444038868 | 5 | 17.2413793 | 0.01        |
| 2175-10152 | 1-3 | 1. Male   | 18593.85742 | 5 | 62.5       | 2.51        |
| 2178-10163 | 4-5 | 1. Male   | 61.26358414 | 5 | 61.7021277 | 8.5206383   |
| 2182-10186 | 1-3 | 2. Female | 78.9464798  | 5 | 38.4615385 | 0.01        |
| 2188-10216 | 1-3 | 1. Male   | 75.18891144 | 5 | 65.1162791 | 2.3355814   |
| 2209-10263 | 1-3 | 1. Male   | 3829.77124  | 5 | 29.7297297 | 2.7127027   |
| 2228-10360 | 4-5 | 1. Male   | 137.6486816 | 5 | 55.1724138 | 17.2513793  |
| 2233-10384 | 4-5 | 2. Female | 8689.171875 | 5 | 55.1724138 | 17.2513793  |
| 2243-10433 | 1-3 | 2. Female | 95.95072937 | 5 | 25         | 0.01        |
| 2243-10434 | 1-3 | 1. Male   | 143.1248932 | 5 | 75.6756757 | 51.3613514  |
| 2243-10436 | 1-3 | 1. Male   | 14.89410591 | 5 | 75.6756757 | 51.3613514  |
| 2244-10438 | 1-3 | 1. Male   | 237.6708374 | 5 | 75.6756757 | 51.3613514  |
| 2246-10448 | 1-3 | 2. Female | 17.24055099 | 5 | 37.037037  | 11.12111111 |
| 2247-10454 | 1-3 | 1. Male   | 29.19330406 | 5 | 75.6756757 | 51.3613514  |
| 2247-10456 | 1-3 | 1. Male   | 80.50160217 | 5 | 75.6756757 | 51.3613514  |
| 2248-10461 | 4-5 | 2. Female | 72.31204987 | 5 | 63.4146342 | 4.88804878  |
| 2250-10467 | 1-3 | 2. Female | 226.358551  | 5 | 75.6756757 | 51.3613514  |
| 2251-10472 | 1-3 | 2. Female | 7149.289551 | 5 | 75.6756757 | 51.3613514  |
| 2253-10484 | 4-5 | 2. Female | 8.795941353 | 5 | 75.6756757 | 51.3613514  |
| 2253-10486 | 1-3 | 1. Male   | 18.10214043 | 5 | 75.6756757 | 51.3613514  |
| 2254-10487 | 1-3 | 2. Female | 22.00116348 | 5 | 37.037037  | 11.12111111 |
| 2255-10493 | 4-5 | 1. Male   | 9.235519409 | 5 | 75.6756757 | 51.3613514  |
| 2255-10495 | 1-3 | 1. Male   | 26.73998451 | 5 | 75.6756757 | 51.3613514  |
| 2255-10496 | 1-3 | 2. Female | 2.728907824 | 5 | 75.6756757 | 51.3613514  |
| 2256-10501 | 1-3 | 2. Female | 922.0392456 | 5 | 75.6756757 | 51.3613514  |
| 2258-10504 | 1-3 | 2. Female | 46.1705246  | 5 | 46.3414634 | 26.8392683  |
| 2262-10525 | 4-5 | 2. Female | 9.984987259 | 5 | 43.75      | 6.26        |
| 2266-10545 | 1-3 | 1. Male   | 913.0899048 | 5 | 50         | 5.01        |
| 2267-10551 | 1-3 | 1. Male   | 11.44585896 | 5 | 50         | 5.01        |
| 2268-10556 | 1-3 | 2. Female | 1088.321655 | 5 | 21.2121212 | 3.04030303  |
| 2280-10615 | 1-3 | 1. Male   | 35.13687134 | 5 | 46.3414634 | 26.8392683  |
| 2284-10629 | 4-5 | 2. Female | 4.995824337 | 5 | 53.4883721 | 41.8704651  |
| 2289-10657 | 4-5 | 1. Male   | 20.34976768 | 5 | 46.875     | 9.385       |
| 2290-10659 | 4-5 | 2. Female | 20.1522522  | 5 | 60.6060606 | 18.1918182  |
| 2290-10661 | NA  | NA        | 3.801939964 | 5 | 60.6060606 | 18.1918182  |
| 2293-10676 | 4-5 | 2. Female | 69.5452652  | 5 | 53.4883721 | 41.8704651  |
| 2294-10681 | 4-5 | 1. Male   | 120.0802002 | 5 | 53.4883721 | 41.8704651  |
| 2297-10696 | 4-5 | 1. Male   | 3.692308903 | 5 | 46.875     | 9.385       |

|            |     |           |             |   |            |            |
|------------|-----|-----------|-------------|---|------------|------------|
| 2300-10712 | 4-5 | 1. Male   | 3.349193573 | 5 | 59.375     | 0.01       |
| 2303-10728 | 4-5 | 1. Male   | 80.50160217 | 5 | 46.875     | 9.385      |
| 2311-10767 | 1-3 | 2. Female | 101.7332993 | 5 | 53.4883721 | 41.8704651 |
| 2314-10783 | 4-5 | 2. Female | 272.4438171 | 5 | 53.4883721 | 41.8704651 |
| 2316-10792 | 1-3 | 1. Male   | 4.315890789 | 5 | 53.4883721 | 41.8704651 |
| 2316-10793 | 1-3 | 2. Female | 16.90750885 | 5 | 46.875     | 9.385      |
| 2356-10989 | 4-5 | 1. Male   | 426.6997986 | 5 | 37.5       | 5.01       |
| 2394-11155 | 1-3 | 2. Female | 21.36673737 | 5 | 51.3513514 | 21.6316216 |
| 2405-11212 | 4-5 | 2. Female | 230.8174744 | 5 | 51.3513514 | 21.6316216 |
| 2437-11365 | NA  | NA        | 715.5155029 | 5 | 58.3333333 | 5.56555556 |
| 2437-11366 | 1-3 | 2. Female | 1444.092041 | 5 | 52.631579  | 26.3257895 |
| 2441-11387 | 1-3 | 1. Male   | 240.0002899 | 5 | 58.3333333 | 5.56555556 |
| 2442-11393 | 4-5 | 1. Male   | 141.7358398 | 5 | 17.6470588 | 2.95117647 |
| 2448-11422 | 1-3 | 2. Female | 197.4676056 | 5 | 33.3333333 | 11.1211111 |
| 2450-11434 | 1-3 | 2. Female | 16.41996384 | 5 | 33.3333333 | 11.1211111 |
| 2451-11436 | 4-5 | 2. Female | 27.26670837 | 5 | 33.3333333 | 11.1211111 |
| 2452-11442 | 4-5 | 1. Male   | 82.08728027 | 5 | 17.6470588 | 2.95117647 |
| 2490-11623 | 1-3 | 1. Male   | 4.71186161  | 5 | 38.0952381 | 35.7242857 |
| 2495-11650 | 4-5 | 2. Female | 484.3815613 | 5 | 38.0952381 | 35.7242857 |
| 2499-11670 | 4-5 | 1. Male   | 6.252160072 | 5 | 40.8163265 | 18.3773469 |
| 2934-13737 | 1-3 | 2. Female | 15.04008579 | 3 | 59.1836735 | 4.09163265 |
| 2971-13918 | 1-3 | 2. Female | 6.437797546 | 3 | 70.212766  | 2.13765957 |
| 2976-13947 | 1-3 | 2. Female | 25.71686745 | 3 | 63.0434783 | 17.4013044 |
| 2977-13949 | 1-3 | 1. Male   | 14.74954987 | 3 | 46.4285714 | 8.93857143 |
| 2983-13981 | 1-3 | 2. Female | 372.2389221 | 3 | 70.212766  | 2.13765957 |
| 2987-13999 | 1-3 | 2. Female | 612.1341553 | 3 | 70.212766  | 2.13765957 |
| 2991-14016 | 1-3 | 2. Female | 1430.076904 | 3 | 16.2790698 | 9.31232558 |
| 2994-14032 | 1-3 | 1. Male   | 8604.842773 | 3 | 71.4285714 | 23.8195238 |
| 3001-14067 | 1-3 | 1. Male   | 14.74954987 | 3 | 58.8235294 | 13.7354902 |
| 3002-14069 | 1-3 | 1. Male   | 344.2988586 | 3 | 71.4285714 | 23.8195238 |
| 3003-14078 | 4-5 | 2. Female | 224.1615143 | 3 | 58.8235294 | 13.7354902 |
| 3004-14083 | 4-5 | 2. Female | 56.66516876 | 3 | 67.3913044 | 4.35782609 |
| 3027-14195 | 4-5 | 2. Female | 64.95569611 | 3 | 71.4285714 | 23.8195238 |
| 3029-14204 | 1-3 | 1. Male   | 52795.60547 | 3 | 71.4285714 | 23.8195238 |
| 32-154     | 1-3 | 2. Female | 24.49284744 | 4 | 69.3548387 | 8.07451613 |
| 3327-15612 | 4-5 | 1. Male   | 28.35148621 | 7 | 32.7       | 2.01       |
| 3334-15649 | 4-5 | 2. Female | 7.166893482 | 7 | 47.4       | 21.11      |
| 3335-15652 | 4-5 | 2. Female | 6.564609051 | 7 | 47.4       | 21.11      |
| 3380-15877 | 4-5 | 1. Male   | 3.656471014 | 7 | 47.4       | 21.11      |
| 3387-15914 | 1-3 | 1. Male   | 1.977916598 | 7 | 47.4       | 21.11      |
| 3395-15950 | 4-5 | 1. Male   | 164.0651093 | 7 | 50.9       | 24.51      |
| 3396-15955 | 1-3 | 2. Female | 4.804675579 | 7 | 64         | 10.01      |
| 3399-15973 | 4-5 | 2. Female | 113.2547836 | 7 | 50.9       | 24.51      |
| 3417-16061 | 4-5 | 2. Female | 10.69049644 | 7 | 55.6       | 5.61       |
| 3433-16143 | 1-3 | 1. Male   | 17.24055099 | 7 | 40.4       | 4.31       |
| 3437-16160 | 4-5 | 1. Male   | 2.451292992 | 7 | 79.1       | 16.31      |

|            |     |           |             |    |            |            |
|------------|-----|-----------|-------------|----|------------|------------|
| 3438-16167 | 1-3 | 1. Male   | 68.87025452 | 7  | 57.1       | 2.41       |
| 3447-16212 | 4-5 | 2. Female | 24.7328949  | 7  | 39         | 9.81       |
| 3454-16248 | 4-5 | 2. Female | 5.14415884  | 7  | 50.9       | 24.51      |
| 3457-16264 | 1-3 | 2. Female | 10.90107727 | 7  | 56.4       | 10.91      |
| 3458-16265 | 4-5 | 2. Female | 51.39946747 | 7  | 55.6       | 5.61       |
| 3458-16266 | 4-5 | 2. Female | 27.53395462 | 7  | 50.9       | 24.51      |
| 3459-16273 | 4-5 | 1. Male   | 102.7304077 | 7  | 57.1       | 2.41       |
| 3462-16289 | 1-3 | 2. Female | 19.38119125 | 7  | 39.7       | 12.11      |
| 3508-16516 | 1-3 | 2. Female | 36.18014526 | 7  | 66.7       | 9.81       |
| 3520-16577 | 1-3 | 1. Male   | 116.6175156 | 7  | 50         | 11.91      |
| 3532-16637 | 4-5 | 2. Female | 280.5331421 | 7  | 50         | 11.91      |
| 3538-16667 | 1-3 | 2. Female | 138.9978027 | 7  | 43.9       | 17.11      |
| 3543-16689 | 1-3 | 1. Male   | 175225.9688 | 7  | 61.5       | 7.71       |
| 3544-16697 | 1-3 | 1. Male   | 84.52458954 | 7  | 54.7       | 4.71       |
| 3566-16805 | 1-3 | 1. Male   | 39788.73828 | 7  | 37.5       | 2.11       |
| 3573-16841 | 4-5 | 2. Female | 31.25602722 | 7  | 54.7       | 4.71       |
| 3773-17820 | 1-3 | 2. Female | 25.96892357 | 9  | 47.6       | 11.91      |
| 3778-17846 | 4-5 | 1. Male   | 36.89281845 | 9  | 47.6       | 11.91      |
| 3780-17855 | 1-3 | 2. Female | 49.91728973 | 9  | 47.6       | 11.91      |
| 3780-17857 | 1-3 | 1. Male   | 13.24906158 | 9  | 53.1       | 3.11       |
| 3793-17922 | 4-5 | 2. Female | 655.3856812 | 9  | 27.9       | 2.31       |
| 3797-17943 | 1-3 | 2. Female | 6.693918705 | 9  | 27.9       | 2.31       |
| 3811-18007 | 4-5 | 1. Male   | 92.27948761 | 9  | 41.3       | 0.01       |
| 3816-18033 | 4-5 | 2. Female | 170.5922546 | 9  | 41.3       | 0.01       |
| 3822-18059 | 1-3 | 2. Female | 19.76296043 | 9  | 44.6       | 10.71      |
| 3839-18146 | 1-3 | 1. Male   | 1.847386003 | 9  | 42.6       | 5.61       |
| 42-207     | 4-5 | 2. Female | 84.52458954 | 4  | 69.3548387 | 8.07451613 |
| 45-216     | 4-5 | 1. Male   | 1576.583496 | 4  | 90.6976744 | 39.5448837 |
| 45-218     | 4-5 | 1. Male   | 141.7358398 | 4  | 46.1538462 | 3.85615385 |
| 48-231     | 1-3 | 2. Female | 20.75061607 | 4  | 90.6976744 | 39.5448837 |
| 5383-36710 | 1-3 | 1. Male   | 4.758040905 | 13 | 61.3       | 16.11      |
| 5386-36723 | 4-5 | 2. Female | 303.298584  | 13 | 38.1       | 4.81       |
| 5389-36737 | 4-5 | 2. Female | 30.65224075 | 13 | 38.1       | 4.81       |
| 5390-36742 | 4-5 | 1. Male   | 28.90995216 | 13 | 38.1       | 4.81       |
| 5392-36753 | 4-5 | 2. Female | 80.50160217 | 13 | 55         | 25.01      |
| 5395-36766 | 1-3 | 2. Female | 357.9963989 | 13 | 38.1       | 4.81       |
| 5395-36770 | 1-3 | 2. Female | 39.88671494 | 13 | 55         | 25.01      |
| 64-311     | 4-5 | 2. Female | 24.97530746 | 4  | 55.1724138 | 31.0444828 |
| 64-314     | 1-3 | 1. Male   | 6.437797546 | 4  | 90.6976744 | 39.5448837 |
| 65-316     | 1-3 | 1. Male   | 88.74871063 | 4  | 58.0645161 | 22.5906452 |
| 70-340     | 4-5 | 2. Female | 12.74212933 | 4  | 55.1724138 | 31.0444828 |
| 71-347     | 1-3 | 2. Female | 5.782876015 | 4  | 60.6060606 | 12.1312121 |
| 73-355     | 1-3 | 1. Male   | 70.22689056 | 4  | 64.9122807 | 21.0626316 |
| 75-367     | 1-3 | 2. Female | 2971.959473 | 4  | 78.2608696 | 13.0534783 |
| 77-379     | 1-3 | 1. Male   | 19.76296043 | 4  | 64.9122807 | 21.0626316 |
| 78-382     | 4-5 | 1. Male   | 6.960232258 | 4  | 58.0645161 | 22.5906452 |

|          |     |           |             |   |            |             |
|----------|-----|-----------|-------------|---|------------|-------------|
| 850-3968 | 1-3 | 2. Female | 758.6360474 | 6 | 79.3103448 | 3.45827586  |
| 859-3999 | 1-3 | 1. Male   | 513.5733643 | 6 | 71.1538462 | 17.3176923  |
| 865-4011 | 1-3 | 1. Male   | 107.8642578 | 6 | 71.1538462 | 17.3176923  |
| 866-4014 | 4-5 | 2. Female | 668.295166  | 6 | 81.4814815 | 11.12111111 |
| 868-4024 | 1-3 | 1. Male   | 4.031065941 | 6 | 83.7209302 | 18.6146512  |
| 872-4044 | 1-3 | 1. Male   | 111.0670395 | 6 | 56.4516129 | 27.4293548  |
| 875-4061 | 1-3 | 1. Male   | 4.35819149  | 6 | 83.7209302 | 18.6146512  |
| 883-4100 | 1-3 | 2. Female | 12.74212933 | 6 | 83.7209302 | 18.6146512  |
| 884-4103 | 1-3 | 2. Female | 58.91953278 | 6 | 83.7209302 | 18.6146512  |
| 889-4129 | 1-3 | 2. Female | 85.35303497 | 6 | 83.7209302 | 18.6146512  |
| 889-4130 | 4-5 | 2. Female | 39.11618805 | 6 | 83.7209302 | 18.6146512  |

| tf_dv  | ti_dv  | ts_dv  | porf2_ul   | omcb_ul    | TF_Dist | TI_Dist |
|--------|--------|--------|------------|------------|---------|---------|
| 1. Yes | 0. No  | 0. No  | 201.300355 | 46.8385704 | 17.8    | 4.3     |
| 0. No  | 0. No  | 0. No  | 120.280487 | 28.7642294 | 18.8    | 6.2     |
| 1. Yes | 0. No  | 0. No  | 53.3908332 | 28.8505159 | 18.8    | 6.2     |
| 0. No  | 0. No  | 0. No  | 12.0265161 | 6.15848525 | 18.8    | 6.2     |
| 0. No  | 0. No  | 0. No  | NA         | NA         | 18.8    | 6.2     |
| 0. No  | 1. Yes | 0. No  | NA         | NA         | 18.8    | 6.2     |
| 0. No  | 0. No  | 1. Yes | 34.1504944 | 11.6627178 | 24.3    | 6.5     |
| 1. Yes | 1. Yes | 0. No  | 83.3355826 | 27.7061638 | 23.9    | 8.8     |
| 0. No  | 0. No  | 0. No  | NA         | 297.280928 | 23.9    | 8.8     |
| 1. Yes | 0. No  | 0. No  | 41.2820224 | 9.78043356 | 23.9    | 8.8     |
| 1. Yes | 1. Yes | 0. No  | 433.815841 | 113.510589 | 23.9    | 8.8     |
| 1. Yes | 1. Yes | 0. No  | NA         | 93.6136872 | 23.9    | 8.8     |
| 0. No  | 0. No  | 0. No  | 228.749135 | 71.454164  | 23.9    | 8.8     |
| 1. Yes | 0. No  | 0. No  | 386.693194 | 67.4011162 | 23.9    | 8.8     |
| 0. No  | 0. No  | 0. No  | NA         | 135.054936 | 23.9    | 8.8     |
| 1. Yes | 1. Yes | 0. No  | NA         | NA         | 23.9    | 8.8     |
| 1. Yes | 1. Yes | 0. No  | NA         | NA         | 23.9    | 8.8     |
| 1. Yes | 0. No  | 0. No  | NA         | NA         | 23.9    | 8.8     |
| 0. No  | 1. Yes | 0. No  | 247.735204 | 53.7087063 | 23.9    | 8.8     |
| 1. Yes | 0. No  | 0. No  | 211.388326 | 50.6027708 | 33.8    | 9.7     |
| 1. Yes | 0. No  | 0. No  | 71.5939156 | 25.1466777 | 33.8    | 9.7     |
| 1. Yes | 1. Yes | 0. No  | 136.218761 | 42.532198  | 33.8    | 9.7     |
| 1. Yes | 1. Yes | 0. No  | 119.303071 | 29.4769413 | 33.8    | 9.7     |
| 1. Yes | 0. No  | 0. No  | 291.571188 | 68.1090396 | 33.8    | 9.7     |
| 1. Yes | 0. No  | 0. No  | NA         | NA         | 33.8    | 9.7     |
| 1. Yes | 1. Yes | 0. No  | NA         | NA         | 33.8    | 9.7     |
| 1. Yes | 1. Yes | 0. No  | 72.8215031 | 18.9221291 | 44.9    | 10.7    |
| 1. Yes | 0. No  | 0. No  | 254.159874 | 63.8600818 | 44.9    | 10.7    |
| 1. Yes | 1. Yes | 0. No  | NA         | 2028.7985  | 44.9    | 10.7    |
| 0. No  | 1. Yes | 0. No  | 317.379283 | 68.9219974 | 44.9    | 10.7    |
| 1. Yes | 0. No  | 0. No  | 288.739021 | 25.4946442 | 44.9    | 10.7    |
| 1. Yes | 1. Yes | 0. No  | 79.0142154 | 31.1654079 | 30.6    | 9.5     |
| 1. Yes | 1. Yes | 0. No  | 86.308474  | 28.4289973 | 30.6    | 9.5     |
| 0. No  | 0. No  | 0. No  | 98.2225066 | 15.7925791 | 30.6    | 9.5     |
| 1. Yes | 1. Yes | 0. No  | 133.646009 | 35.1027678 | 30.6    | 9.5     |
| 1. Yes | 1. Yes | 0. No  | NA         | NA         | 30.6    | 9.5     |
| 0. No  | 0. No  | 0. No  | NA         | NA         | 30.6    | 9.5     |
| 1. Yes | 1. Yes | 0. No  | NA         | NA         | 30.6    | 9.5     |
| 1. Yes | 1. Yes | 0. No  | 261.193    | 70.3935279 | 30.6    | 9.5     |
| 1. Yes | 1. Yes | 0. No  | 1315.81524 | 485.07641  | 51.8    | 16.3    |
| 1. Yes | 0. No  | 0. No  | 893.372126 | 141.033177 | 51.8    | 16.3    |
| 1. Yes | 1. Yes | 0. No  | 1145.18019 | 237.523296 | 51.8    | 16.3    |
| 1. Yes | 0. No  | 0. No  | 1990.16478 | 160.821421 | 51.8    | 16.3    |
| 1. Yes | 0. No  | 0. No  | NA         | NA         | 51.8    | 16.3    |
| 1. Yes | 0. No  | 0. No  | NA         | NA         | 36.1    | 8.2     |

|        |        |       |            |            |      |      |
|--------|--------|-------|------------|------------|------|------|
| 0. No  | 1. Yes | 0. No | 1574.64062 | 428.416363 | 36.1 | 8.2  |
| 1. Yes | 0. No  | 0. No | 444.350244 | 180.393583 | 36.1 | 8.2  |
| 1. Yes | 0. No  | 0. No | NA         | NA         | 36.1 | 8.2  |
| 0. No  | 0. No  | 0. No | NA         | 1526.55315 | 48.1 | 6.5  |
| 1. Yes | 0. No  | 0. No | NA         | NA         | 48.1 | 6.5  |
| 1. Yes | 1. Yes | 0. No | NA         | 170.528944 | 48.1 | 6.5  |
| 1. Yes | 0. No  | 0. No | NA         | NA         | 48.1 | 6.5  |
| 1. Yes | 0. No  | 0. No | NA         | NA         | 48.1 | 6.5  |
| 1. Yes | 0. No  | 0. No | NA         | NA         | 48.1 | 6.5  |
| 1. Yes | 0. No  | 0. No | NA         | 1716.34048 | 48.1 | 6.5  |
| 1. Yes | 0. No  | 0. No | 152.686839 | 39.9758134 | 48.1 | 6.5  |
| 0. No  | 0. No  | 0. No | 636.221628 | 357.561058 | 48.1 | 6.5  |
| 1. Yes | 0. No  | 0. No | 160.419434 | 73.9853216 | 48.1 | 6.5  |
| 0. No  | 1. Yes | 0. No | NA         | 1821.75952 | 39.2 | 3.5  |
| 1. Yes | 1. Yes | 0. No | 518.296133 | 171.599534 | 28.5 | 5    |
| 1. Yes | 1. Yes | 0. No | NA         | 471.059518 | 28.5 | 5    |
| 1. Yes | 0. No  | 0. No | 576.998142 | 230.541361 | 42.4 | 13.8 |
| 1. Yes | 1. Yes | 0. No | 443.353361 | 163.962117 | 42.4 | 13.8 |
| 1. Yes | 1. Yes | 0. No | NA         | NA         | 42.4 | 13.8 |
| 1. Yes | 1. Yes | 0. No | 634.732474 | 221.372253 | 42.4 | 13.8 |
| 1. Yes | 0. No  | 0. No | NA         | NA         | 42.4 | 13.8 |
| 1. Yes | 1. Yes | 0. No | 409.371105 | 130.857149 | 42.4 | 13.8 |
| 1. Yes | 0. No  | 0. No | 363.048082 | 118.217785 | 42.4 | 13.8 |
| 1. Yes | 0. No  | 0. No | 517.786995 | 154.665644 | 42.4 | 13.8 |
| 1. Yes | 1. Yes | 0. No | 740.855257 | 245.813544 | 42.4 | 13.8 |
| 1. Yes | 1. Yes | 0. No | 5536.18289 | 1481.66155 | 42.4 | 13.8 |
| 1. Yes | 1. Yes | 0. No | NA         | NA         | 42.4 | 13.8 |
| 1. Yes | 1. Yes | 0. No | NA         | NA         | 42.4 | 13.8 |
| 0. No  | 1. Yes | 0. No | 217.054233 | 56.7752371 | 42.4 | 13.8 |
| 1. Yes | 1. Yes | 0. No | NA         | NA         | 42.4 | 13.8 |
| 1. Yes | 0. No  | 0. No | 419.470055 | 388.309917 | 42.4 | 13.8 |
| 1. Yes | 0. No  | 0. No | NA         | NA         | 42.4 | 13.8 |
| 1. Yes | 1. Yes | 0. No | 1141.90267 | 331.630714 | 42.4 | 13.8 |
| 1. Yes | 1. Yes | 0. No | 335.521697 | 143.144842 | 34.6 | 10.1 |
| 0. No  | 0. No  | 0. No | NA         | NA         | 34.6 | 10.1 |
| 1. Yes | 0. No  | 0. No | 1775.93544 | 806.058249 | 34.6 | 10.1 |
| 1. Yes | 0. No  | 0. No | NA         | NA         | 34.6 | 10.1 |
| 0. No  | 1. Yes | 0. No | 2060.61083 | 805.152598 | 34.6 | 10.1 |
| 1. Yes | 1. Yes | 0. No | 508.030174 | 145.459044 | 34.6 | 10.1 |
| 1. Yes | 1. Yes | 0. No | NA         | NA         | 41.8 | 11.6 |
| 1. Yes | 0. No  | 0. No | NA         | NA         | 41.8 | 11.6 |
| 1. Yes | 0. No  | 0. No | NA         | NA         | 41.8 | 11.6 |
| NA     | NA     | NA    | NA         | NA         | 41.8 | 11.6 |
| 1. Yes | 1. Yes | 0. No | 588.193841 | 220.349677 | 41.8 | 11.6 |
| 1. Yes | 1. Yes | 0. No | 651.892878 | 156.671921 | 41.8 | 11.6 |
| 1. Yes | 0. No  | 0. No | NA         | NA         | 41.8 | 11.6 |

|        |        |        |            |            |      |      |
|--------|--------|--------|------------|------------|------|------|
| 1. Yes | 0. No  | 0. No  | 13.7142283 | 7.14273723 | 41.8 | 11.6 |
| 1. Yes | 0. No  | 0. No  | 860.801698 | 218.740927 | 41.8 | 11.6 |
| 1. Yes | 0. No  | 0. No  | 1.53089755 | 1.12985593 | 41.8 | 11.6 |
| 1. Yes | 1. Yes | 0. No  | 783.900539 | 245.505197 | 41.8 | 11.6 |
| 1. Yes | 1. Yes | 0. No  | NA         | NA         | 41.8 | 11.6 |
| 1. Yes | 0. No  | 0. No  | NA         | NA         | 41.8 | 11.6 |
| 1. Yes | 1. Yes | 0. No  | 1105.15283 | 202.497681 | 35.8 | 4.9  |
| 1. Yes | 1. Yes | 0. No  | 172.186105 | 48.1608956 | 33.8 | 5.9  |
| 1. Yes | 0. No  | 0. No  | 855.50826  | 90.917979  | 33.8 | 5.9  |
| NA     | NA     | NA     | 1256.2074  | 456.685001 | 39.8 | 9.6  |
| 0. No  | 1. Yes | 0. No  | 2610.35488 | 1402.22543 | 39.8 | 9.6  |
| 0. No  | 1. Yes | 0. No  | 1095.27845 | 437.860984 | 39.8 | 9.6  |
| 1. Yes | 0. No  | 0. No  | 1104.0834  | 427.31236  | 39.8 | 9.6  |
| 1. Yes | 0. No  | 0. No  | 1622.95178 | 703.413885 | 39.8 | 9.6  |
| 0. No  | 1. Yes | 0. No  | NA         | NA         | 39.8 | 9.6  |
| 0. No  | 0. No  | 0. No  | 108.782674 | 48.4725219 | 39.8 | 9.6  |
| 1. Yes | 0. No  | 0. No  | 176.0866   | 57.4189874 | 39.8 | 9.6  |
| 1. Yes | 1. Yes | 0. No  | NA         | NA         | 33.8 | 9.7  |
| 0. No  | 1. Yes | 0. No  | 636.307801 | 184.440494 | 33.8 | 9.7  |
| 1. Yes | 0. No  | 0. No  | NA         | NA         | 33.8 | 9.7  |
| 1. Yes | 0. No  | 0. No  | NA         | NA         | 24.5 | 3.7  |
| 1. Yes | 0. No  | 0. No  | NA         | NA         | 41.1 | 7.7  |
| 1. Yes | 1. Yes | 0. No  | 264.739619 | 51.5268816 | 41.1 | 7.7  |
| 0. No  | 1. Yes | 0. No  | NA         | NA         | 41.1 | 7.7  |
| 1. Yes | 0. No  | 0. No  | 243.917988 | 77.5971613 | 41.1 | 7.7  |
| 1. Yes | 0. No  | 0. No  | 155.358239 | 64.5400135 | 41.1 | 7.7  |
| 1. Yes | 0. No  | 0. No  | 339.440465 | 103.123396 | 27.6 | 7.8  |
| 1. Yes | 1. Yes | 0. No  | NA         | 115.815582 | 27.6 | 7.8  |
| 1. Yes | 0. No  | 0. No  | NA         | NA         | 27.6 | 7.8  |
| 1. Yes | 0. No  | 0. No  | 238.707766 | 88.3749311 | 27.6 | 7.8  |
| 0. No  | 1. Yes | 0. No  | 221.157189 | 82.9690385 | 27.6 | 7.8  |
| 1. Yes | 0. No  | 0. No  | 80.7635691 | 16.6583867 | 27.6 | 7.8  |
| 1. Yes | 0. No  | 0. No  | 83.9912562 | 21.031085  | 27.6 | 7.8  |
| 1. Yes | 1. Yes | 0. No  | NA         | 1300.64415 | 27.6 | 7.8  |
| 1. Yes | 0. No  | 0. No  | 184.086146 | 46.5618139 | 73.9 | 8    |
| 1. Yes | 0. No  | 0. No  | 174.351208 | 44.236064  | 29.1 | 5    |
| 1. Yes | 1. Yes | 0. No  | NA         | NA         | 29.1 | 5    |
| 1. Yes | 0. No  | 0. No  | NA         | NA         | 29.1 | 5    |
| 1. Yes | 0. No  | 0. No  | NA         | NA         | 29.1 | 5    |
| 0. No  | 1. Yes | 0. No  | NA         | NA         | 29.1 | 5    |
| 1. Yes | 0. No  | 0. No  | 333.175224 | 120.75662  | 49.5 | 9.5  |
| 1. Yes | 1. Yes | 1. Yes | NA         | NA         | 49.5 | 9.5  |
| 1. Yes | 0. No  | 0. No  | 340.757429 | 147.378736 | 49.5 | 9.5  |
| 1. Yes | 1. Yes | 0. No  | NA         | NA         | 49.5 | 9.5  |
| 1. Yes | 0. No  | 0. No  | NA         | NA         | 49.5 | 9.5  |
| 1. Yes | 1. Yes | 0. No  | NA         | NA         | 49.5 | 9.5  |



|        |        |       |            |            |       |      |
|--------|--------|-------|------------|------------|-------|------|
| 1. Yes | 0. No  | 0. No | 165.339724 | 51.2749192 | 49.5  | 9.5  |
| 1. Yes | 1. Yes | 0. No | 321.090671 | 41.9051725 | 49.5  | 9.5  |
| 0. No  | 1. Yes | 0. No | NA         | NA         | 49.5  | 9.5  |
| 0. No  | 1. Yes | 0. No | NA         | NA         | 49.5  | 9.5  |
| 1. Yes | 0. No  | 0. No | 142.391471 | 38.1352591 | 49.5  | 9.5  |
| 1. Yes | 1. Yes | 0. No | 80.6910744 | 32.373195  | 49.5  | 9.5  |
| 1. Yes | 0. No  | 0. No | 522.038059 | 189.899674 | 49.5  | 9.5  |
| 1. Yes | 0. No  | 0. No | NA         | NA         | 35.8  | 7.3  |
| 1. Yes | 1. Yes | 0. No | 188.890468 | 53.9064127 | 35.8  | 7.3  |
| 1. Yes | 1. Yes | 0. No | 775.446372 | 254.891363 | 35.8  | 7.4  |
| 1. Yes | 0. No  | 0. No | 668.682842 | 230.971083 | 35.8  | 7.4  |
| 1. Yes | 1. Yes | 0. No | 278.232786 | 64.1587688 | 35.8  | 7.4  |
| 1. Yes | 0. No  | 0. No | NA         | 18042.2086 | 35.6  | 4.9  |
| 1. Yes | 0. No  | 0. No | 143.169667 | 52.9249419 | 35.6  | 4.9  |
| 0. No  | 0. No  | 0. No | NA         | 1219.20358 | 35.6  | 4.9  |
| 0. No  | 0. No  | 0. No | 123.942589 | 20.1812657 | 35.6  | 4.9  |
| 1. Yes | 1. Yes | 0. No | 390.667106 | 225.605518 | 32.6  | 6.7  |
| 1. Yes | 0. No  | 0. No | 206.738801 | 103.472168 | 32.6  | 6.7  |
| 1. Yes | 1. Yes | 0. No | 463.294604 | 167.001394 | 32.6  | 6.7  |
| 1. Yes | 0. No  | 0. No | NA         | NA         | 32.6  | 6.7  |
| 0. No  | 0. No  | 0. No | 464.702713 | 126.894028 | 20.7  | 3.7  |
| 1. Yes | 0. No  | 0. No | NA         | NA         | 20.7  | 3.7  |
| 1. Yes | 0. No  | 0. No | NA         | NA         | 47.8  | 9.6  |
| 1. Yes | 0. No  | 0. No | 460.146968 | 141.220976 | 47.8  | 9.6  |
| 1. Yes | 1. Yes | 0. No | NA         | NA         | 45.7  | 8.4  |
| 1. Yes | 1. Yes | 0. No | NA         | NA         | 45.7  | 8.4  |
| 1. Yes | 0. No  | 0. No | 452.18961  | 137.356458 | 73.9  | 8    |
| 1. Yes | 1. Yes | 0. No | 1388.33755 | 287.065513 | 62    | 21.4 |
| 1. Yes | 0. No  | 0. No | 2954.90642 | 1122.00055 | 62    | 21.4 |
| 1. Yes | 1. Yes | 0. No | NA         | NA         | 62    | 21.4 |
| 1. Yes | 0. No  | NA    | NA         | NA         | 36.96 | 6.2  |
| 1. Yes | 0. No  | NA    | 201.277466 | 62.8366808 | 36.96 | 6.2  |
| 1. Yes | 0. No  | NA    | 232.454556 | 41.5817723 | 36.96 | 6.2  |
| 1. Yes | 0. No  | NA    | 173.311427 | 28.7748288 | 36.96 | 6.2  |
| 1. Yes | 1. Yes | NA    | 122.363369 | 48.6953082 | 36.96 | 6.2  |
| 1. Yes | 0. No  | NA    | NA         | NA         | 36.96 | 6.2  |
| 1. Yes | 0. No  | NA    | 248.637628 | 68.757835  | 36.96 | 6.2  |
| 1. Yes | 1. Yes | 0. No | 429.926871 | 125.13909  | 62    | 21.4 |
| 1. Yes | 0. No  | 0. No | NA         | NA         | 62    | 21.4 |
| 1. Yes | 1. Yes | 0. No | 1775.5108  | 530.872465 | 62    | 21.4 |
| 1. Yes | 1. Yes | 0. No | NA         | NA         | 62    | 21.4 |
| 1. Yes | 0. No  | 0. No | NA         | NA         | 62    | 21.4 |
| 0. No  | 1. Yes | 0. No | 888.35864  | 407.634929 | 62    | 21.4 |
| 1. Yes | 0. No  | 0. No | NA         | 1145.63417 | 62    | 21.4 |
| 1. Yes | 1. Yes | 0. No | NA         | NA         | 62    | 21.4 |
| 1. Yes | 0. No  | 0. No | NA         | NA         | 62    | 21.4 |

|        |        |       |            |            |      |      |
|--------|--------|-------|------------|------------|------|------|
| 1. Yes | 0. No  | 0. No | 443.919333 | 188.219808 | 58.9 | 13.4 |
| 1. Yes | 0. No  | 0. No | 274.338636 | 49.5509187 | 65.3 | 13.9 |
| 1. Yes | 1. Yes | 0. No | 249.561181 | 77.3758922 | 65.3 | 13.9 |
| 1. Yes | 0. No  | 0. No | 197.335206 | 45.2463667 | 55.6 | 14.2 |
| 1. Yes | 0. No  | 0. No | NA         | NA         | 55.6 | 14.2 |
| 1. Yes | 1. Yes | 0. No | 127.900907 | 39.3536285 | 55.6 | 14.2 |
| 1. Yes | 1. Yes | 0. No | NA         | NA         | 55.6 | 14.2 |
| 1. Yes | 0. No  | 0. No | NA         | NA         | 55.6 | 14.2 |
| 1. Yes | 0. No  | 0. No | NA         | 28.8970678 | 55.6 | 14.2 |
| 1. Yes | 1. Yes | 0. No | 645.178304 | 294.574024 | 55.6 | 14.2 |
| 1. Yes | 0. No  | 0. No | 313.668433 | 132.871053 | 55.6 | 14.2 |









|       |             |          |        |                 |       |
|-------|-------------|----------|--------|-----------------|-------|
| 2.98  | ROUNDS_MDA8 | GAAAAGG  | 10T/8A | GAAAAGG_10T/8A  | ATTCT |
| 25    | ROUNDS_MDA8 | GAAAAGG  | 10T/8A | GAAAAGG_10T/8A  | ATTCT |
| 25    | ROUNDS_MDA8 | GAAAAGG  | 10T/8A | GAAAAGG_10T/8A  | ATTCT |
| 16.18 | ROUNDS_MDA8 | GAAAAAGG | 10T/8A | GAAAAAGG_10T/8A | ATTCT |
| 16.18 | ROUNDS_MDA8 | GAAAAAGG | 10T/8A | GAAAAAGG_10T/8A | ATTCT |
| 16.18 | ROUNDS_MDA8 | GAAAAGG  | 10T/8A | GAAAAGG_10T/8A  | ATTCT |
| 16.18 | ROUNDS_MDA8 | GAAAAAGG | 10T/8A | GAAAAAGG_10T/8A | ATTCT |
| 16.18 | ROUNDS_MDA8 | GAAAAGG  | 10T/8A | GAAAAGG_10T/8A  | ATTCT |
| 16.18 | ROUNDS_MDA8 | GAAAAAGG | 10T/8A | GAAAAAGG_10T/8A | ATTCT |
| 16.18 | ROUNDS_MDA8 | GAAAAGG  | 10T/8A | GAAAAGG_10T/8A  | ATTCT |
| 16.18 | ROUNDS_MDA8 | GAAAAGG  | 10T/8A | GAAAAGG_10T/8A  | ATTCT |

| CT1299 | RIGHT_FLANK | CT1299_flank | CT1291_FLANK | CT1291 | CT1291_Flank_comb. |
|--------|-------------|--------------|--------------|--------|--------------------|
| 10C    |             | ATTCT_10C_   | AAATGGTCT    | 10C    | AAATGGTCT_10C      |
| 10C    |             | ATTCT_10C_   | AAATGGTCT    | 10C    | AAATGGTCT_10C      |
| 13C    |             | ATTCT_13C_   | AAATGGTCT    | 9C     | AAATGGTCT_9C       |
| 10C    |             | ATTCT_10C_   | AAATGGTCT    | 9C     | AAATGGTCT_9C       |
| 11C    |             | ATTCT_11C_   | AAATGGTCT    | 9C     | AAATGGTCT_9C       |
| 10C    |             | ATTCT_10C_   | AAATGGTCT    | 10C    | AAATGGTCT_10C      |
| 14C    |             | ATTCT_14C_   | AAATGGTCT    | 9C     | AAATGGTCT_9C       |
| 10C    |             | ATTCT_10C_   | AAATGGTCT    | 9C     | AAATGGTCT_9C       |
| 13C    |             | ATTCT_13C_   | AAATGGTCT    | 10C    | AAATGGTCT_10C      |
| 13C    |             | ATTCT_13C_   | AAATGGTCT    | 10C    | AAATGGTCT_10C      |
| 9C     |             | ATTCT_9C_    | AAATGGTCT    | 8C     | AAATGGTCT_8C       |
| 13C    |             | ATTCT_13C_   | AAATGGTCT    | 10C    | AAATGGTCT_10C      |
| 10C    |             | ATTCT_10C_   | AAATGGTCT    | 9C     | AAATGGTCT_9C       |
| 11C    |             | ATTCT_11C_   | AAATGGTCT    | 9C     | AAATGGTCT_9C       |
| 11C    |             | ATTCT_11C_   | AAATGGTCT    | 9C     | AAATGGTCT_9C       |
| 14C    |             | ATTCT_14C_   | AAATGGTCT    | 9C     | AAATGGTCT_9C       |
| 9C     |             | ATTCT_9C_    | AAATGGTCT    | 8C     | AAATGGTCT_8C       |
| 10C    |             | ATTCT_10C_   | AAATGGTCT    | 8C     | AAATGGTCT_8C       |
| 14C    |             | ATTCT_14C_   | AAATGGTCT    | 8C     | AAATGGTCT_8C       |
| 10C    |             | ATTCT_10C_   | AAATGGTCT    | 9C     | AAATGGTCT_9C       |
| 12C    |             | ATTCT_12C_   | AAATGGTCT    | 9C     | AAATGGTCT_9C       |
| 10C    |             | ATTCT_10C_   | AAATGGTCT    | 9C     | AAATGGTCT_9C       |
| 11C    |             | ATTCT_11C_   | AAATGGTCT    | 9C     | AAATGGTCT_9C       |
| 10C    |             | ATTCT_10C_   | AAATGGTCT    | 9C     | AAATGGTCT_9C       |
| 14C    |             | ATTCT_14C_   | AAATGGTCT    | 8C     | AAATGGTCT_8C       |
| 11C    |             | ATTCT_11C_   | AAATGGTCT    | 9C     | AAATGGTCT_9C       |
| 14C    |             | ATTCT_14C_   | AAATGGTCT    | 10C    | AAATGGTCT_10C      |
| 11C    |             | ATTCT_11C_   | AAATGGTCT    | 9C     | AAATGGTCT_9C       |
| 13C    |             | ATTCT_13C_   | AAATGGTCT    | 11C    | AAATGGTCT_11C      |
| 11C    |             | ATTCT_11C_   | AAATGGTCT    | 10C    | AAATGGTCT_10C      |
| 14C    |             | ATTCT_14C_   | AAATGGTCT    | 10C    | AAATGGTCT_10C      |
| 14C    |             | ATTCT_14C_   | AAATGGTCT    | 9C     | AAATGGTCT_9C       |
| 10C    |             | ATTCT_10C_   | AAATGGTCT    | 9C     | AAATGGTCT_9C       |
| 10C    |             | ATTCT_10C_   | AAATGGTCT    | 9C     | AAATGGTCT_9C       |
| 10C    |             | ATTCT_10C_   | AAATGGTCT    | 9C     | AAATGGTCT_9C       |
| 10C    |             | ATTCT_10C_   | AAATGGTCT    | 9C     | AAATGGTCT_9C       |
| 11C    |             | ATTCT_11C_   | AAATGGTCT    | 9C     | AAATGGTCT_9C       |
| 14C    |             | ATTCT_14C_   | AAATGGTCT    | 10C    | AAATGGTCT_10C      |
| 10C    |             | ATTCT_10C_   | AAATGGTCT    | 9C     | AAATGGTCT_9C       |
| 10C    |             | ATTCT_10C_   | AAATGGTCT    | 9C     | AAATGGTCT_9C       |
| 9C     |             | ATTCT_9C_    | AAATGGT      | 8C     | AAATGGT_8C         |
| 11C    |             | ATTCT_11C_   | AAATGGTCT    | 10C    | AAATGGTCT_10C      |
| 11C    |             | ATTCT_11C_   | AAATGGTCT    | 9C     | AAATGGTCT_9C       |
| 9C     |             | ATTCT_9C_    | AAATGGT      | 8C     | AAATGGT_8C         |
| 9C     |             | ATTCT_9C_    | AAATGGT      | 8C     | AAATGGT_8C         |
| 13C    |             | ATTCT_13C_   | AAATGGTCT    | 9C     | AAATGGTCT_9C       |



|     |                      |     |               |
|-----|----------------------|-----|---------------|
| 10C | ATTCT_10C_ AAATGGTCT | 9C  | AAATGGTCT_9C  |
| 10C | ATTCT_10C_ AAATGGTCT | 8C  | AAATGGTCT_8C  |
| 11C | ATTCT_11C_ AAATGGTCT | 11C | AAATGGTCT_11C |
| 11C | ATTCT_11C_ AAATGGTCT | 9C  | AAATGGTCT_9C  |
| 10C | ATTCT_10C_ AAATGGTCT | 10C | AAATGGTCT_10C |
| 10C | ATTCT_10C_ AAATGGTCT | 8C  | AAATGGTCT_8C  |
| 14C | ATTCT_14C_ AAATGGTCT | 10C | AAATGGTCT_10C |
| 14C | ATTCT_14C_ AAATGGTCT | 8C  | AAATGGTCT_8C  |
| 11C | ATTCT_11C_ AAATGGTCT | 10C | AAATGGTCT_10C |
| 10C | ATTCT_10C_ AAATGGTCT | 8C  | AAATGGTCT_8C  |
| 9C  | ATTCT_9C_ AAATGGTCT  | 9C  | AAATGGTCT_9C  |
| 14C | ATTCT_14C_ AAATGGTCT | 8C  | AAATGGTCT_8C  |
| 13C | ATTCT_13C_ AAATGGTCT | 8C  | AAATGGTCT_8C  |
| 11C | ATTCT_11C_ AAATGGTCT | 8C  | AAATGGTCT_8C  |
| 10C | ATTCT_10C_ AAATGGTCT | 8C  | AAATGGTCT_8C  |
| 10C | ATTCT_10C_ AAATGGTCT | 8C  | AAATGGTCT_8C  |
| 10C | ATTCT_10C_ AAATGGTCT | 8C  | AAATGGTCT_8C  |
| 9C  | ATTCT_9C_ AAATGGT    | 8C  | AAATGGT_8C    |
| 10C | ATTCT_10C_ AAATGGT   | 9C  | AAATGGT_9C    |
| 9C  | ATTCT_9C_ AAATGGT    | 8C  | AAATGGT_8C    |
| 9C  | ATTCT_9C_ AAATGGT    | 8C  | AAATGGT_8C    |
| 10C | ATTCT_10C_ AAATGGT   | 8C  | AAATGGT_8C    |
| 10C | ATTCT_10C_ AAATGGTCT | 9C  | AAATGGTCT_9C  |
| 10C | ATTCT_10C_ AAATGGTCT | 9C  | AAATGGTCT_9C  |
| 9C  | ATTCT_9C_ AAATGGT    | 8C  | AAATGGT_8C    |
| 10C | ATTCT_10C_ AAATGGT   | 9C  | AAATGGT_9C    |
| 9C  | ATTCT_9C_ AAATGGTCT  | 8C  | AAATGGTCT_8C  |
| 9C  | ATTCT_9C_ AAATGGT    | 8C  | AAATGGT_8C    |
| 9C  | ATTCT_9C_ AAATGGT    | 8C  | AAATGGT_8C    |
| 9C  | ATTCT_9C_ AAATGGT    | 8C  | AAATGGT_8C    |
| 9C  | ATTCT_9C_ AAATGGT    | 8C  | AAATGGT_8C    |
| 9C  | ATTCT_9C_ AAATGGT    | 8C  | AAATGGT_8C    |
| 14C | ATTCT_14C_ AAATGGTCT | 9C  | AAATGGTCT_9C  |
| 9C  | ATTCT_9C_ AAATGGT    | 8C  | AAATGGT_8C    |
| 10C | ATTCT_10C_ AAATGGTCT | 9C  | AAATGGTCT_9C  |
| 14C | ATTCT_14C_ AAATGGTCT | 10C | AAATGGTCT_10C |
| 8C  | ATTCT_8C_ AAATGGTCT  | 9C  | AAATGGTCT_9C  |
| 9C  | ATTCT_9C_ AAATGGTCT  | 9C  | AAATGGTCT_9C  |
| 9C  | ATTCT_9C_ AAATGGTCT  | 9C  | AAATGGTCT_9C  |
| 11C | ATTCT_11C_ AAATGGTCT | 9C  | AAATGGTCT_9C  |
| 10C | ATTCT_10C_ AAATGGTCT | 9C  | AAATGGTCT_9C  |
| 11C | ATTCT_11C_ AAATGGTCT | 8C  | AAATGGTCT_8C  |
| 13C | ATTCT_13C_ AAATGGTCT | 9C  | AAATGGTCT_9C  |
| 14C | ATTCT_14C_ AAATGGTCT | 10C | AAATGGTCT_10C |
| 11C | ATTCT_11C_ AAATGGTCT | 7C  | AAATGGTCT_7C  |
| 11C | ATTCT_11C_ AAATGGTCT | 7C  | AAATGGTCT_7C  |
| 12C | ATTCT_12C_ AAATGGTCT | 8C  | AAATGGTCT_8C  |

|     |           |                      |     |               |
|-----|-----------|----------------------|-----|---------------|
| 10C |           | ATTCT_10C_ AAATGGTCT | 9C  | AAATGGTCT_9C  |
| 12C |           | ATTCT_12C_ AAATGGTCT | 8C  | AAATGGTCT_8C  |
| 11C |           | ATTCT_11C_ AAATGGTCT | 7C  | AAATGGTCT_7C  |
| 10C |           | ATTCT_10C_ AAATGGTCT | 9C  | AAATGGTCT_9C  |
| 11C |           | ATTCT_11C_ AAATGGTCT | 7C  | AAATGGTCT_7C  |
| 12C |           | ATTCT_12C_ AAATGGTCT | 8C  | AAATGGTCT_8C  |
| 10C |           | ATTCT_10C_ AAATGGTCT | 9C  | AAATGGTCT_9C  |
| 10C |           | ATTCT_10C_ AAATGGTCT | 9C  | AAATGGTCT_9C  |
| 14C |           | ATTCT_14C_ AAATGGTCT | 11C | AAATGGTCT_11C |
| 11C |           | ATTCT_11C_ AAATGGTCT | 9C  | AAATGGTCT_9C  |
| 14C |           | ATTCT_14C_ AAATGGTCT | 11C | AAATGGTCT_11C |
| 11C |           | ATTCT_11C_ AAATGGTCT | 9C  | AAATGGTCT_9C  |
| 10C |           | ATTCT_10C_ AAATGGTCT | 8C  | AAATGGTCT_8C  |
| 14C |           | ATTCT_14C_ AAATGGTCT | 8C  | AAATGGTCT_8C  |
| 10C |           | ATTCT_10C_ AAATGGTCT | 9C  | AAATGGTCT_9C  |
| 10C |           | ATTCT_10C_ AAATGGTCT | 9C  | AAATGGTCT_9C  |
| 9C  |           | ATTCT_9C_ AAATGGTCT  | 9C  | AAATGGTCT_9C  |
| 10C |           | ATTCT_10C_ AAATGGTCT | 9C  | AAATGGTCT_9C  |
| 10C |           | ATTCT_10C_ AAATGGT   | 9C  | AAATGGT_9C    |
| 12C |           | ATTCT_12C_ AAATGGTCT | 10C | AAATGGTCT_10C |
| 14C |           | ATTCT_14C_ AAATGGTCT | 10C | AAATGGTCT_10C |
| 10C | 5C-ATCAAA | ATTCT_10C_ AAATGGTCT | 9C  | AAATGGTCT_9C  |
| 11C |           | ATTCT_11C_ AAATGGTCT | 9C  | AAATGGTCT_9C  |
| 10C |           | ATTCT_10C_ AAATGGTCT | 10C | AAATGGTCT_10C |
| 10C |           | ATTCT_10C_ AAATGGTCT | 9C  | AAATGGTCT_9C  |
| 11C |           | ATTCT_11C_ AAATGGTCT | 9C  | AAATGGTCT_9C  |
| 11C |           | ATTCT_11C_ AAATGGTCT | 9C  | AAATGGTCT_9C  |
| 10C |           | ATTCT_10C_ AAATGGTCT | 9C  | AAATGGTCT_9C  |
| 14C |           | ATTCT_14C_ AAATGGTCT | 9C  | AAATGGTCT_9C  |
| 10C |           | ATTCT_10C_ AAATGGTCT | 10C | AAATGGTCT_10C |
| 14C |           | ATTCT_14C_ AAATGGTCT | 9C  | AAATGGTCT_9C  |
| 10C |           | ATTCT_10C_ AAATGGT   | 8C  | AAATGGT_8C    |
| 13C |           | ATTCT_13C_ AAATGGTCT | 9C  | AAATGGTCT_9C  |
| 10C |           | ATTCT_10C_ AAATGGTCT | 10C | AAATGGTCT_10C |
| 10C |           | ATTCT_10C_ AAATGGTCT | 9C  | AAATGGTCT_9C  |
| 10C |           | ATTCT_10C_ AAATGGTCT | 9C  | AAATGGTCT_9C  |
| 10C |           | ATTCT_10C_ AAATGGTCT | 9C  | AAATGGTCT_9C  |
| 10C |           | ATTCT_10C_ AAATGGTCT | 9C  | AAATGGTCT_9C  |
| 10C |           | ATTCT_10C_ AAATGGTCT | 9C  | AAATGGTCT_9C  |
| 10C |           | ATTCT_10C_ AAATGGTCT | 9C  | AAATGGTCT_9C  |
| 11C |           | ATTCT_11C_ AAATGGTCT | 10C | AAATGGTCT_10C |
| 13C |           | ATTCT_13C_ AAATGGTCT | 9C  | AAATGGTCT_9C  |
| 14C |           | ATTCT_14C_ AAATGGTCT | 10C | AAATGGTCT_10C |
| 13C |           | ATTCT_13C_ AAATGGTCT | 9C  | AAATGGTCT_9C  |
| 13C |           | ATTCT_13C_ AAATGGTCT | 10C | AAATGGTCT_10C |
| 10C |           | ATTCT_10C_ AAATGGTCT | 8C  | AAATGGTCT_8C  |
| 14C |           | ATTCT_14C_ AAATGGTCT | 9C  | AAATGGTCT_9C  |

|     |           |                      |     |               |
|-----|-----------|----------------------|-----|---------------|
| 10C |           | ATTCT_10C_ AAATGGTCT | 9C  | AAATGGTCT_9C  |
| 14C |           | ATTCT_14C_ AAATGGTCT | 10C | AAATGGTCT_10C |
| 11C |           | ATTCT_11C_ AAATGGTCT | 10C | AAATGGTCT_10C |
| 11C |           | ATTCT_11C_ AAATGGTCT | 10C | AAATGGTCT_10C |
| 12C |           | ATTCT_12C_ AAATGGTCT | 10C | AAATGGTCT_10C |
| 11C |           | ATTCT_11C_ AAATGGTCT | 11C | AAATGGTCT_11C |
| 14C |           | ATTCT_14C_ AAATGGTCT | 10C | AAATGGTCT_10C |
| 10C |           | ATTCT_10C_ AAATGGTCT | 9C  | AAATGGTCT_9C  |
| 14C |           | ATTCT_14C_ AAATGGTCT | 10C | AAATGGTCT_10C |
| 11C |           | ATTCT_11C_ AAATGGTCT | 9C  | AAATGGTCT_9C  |
| 11C |           | ATTCT_11C_ AAATGGTCT | 9C  | AAATGGTCT_9C  |
| 12C |           | ATTCT_12C_ AAATGGTCT | 9C  | AAATGGTCT_9C  |
| 10C |           | ATTCT_10C_ AAATGGTCT | 9C  | AAATGGTCT_9C  |
| 10C |           | ATTCT_10C_ AAATGGTCT | 9C  | AAATGGTCT_9C  |
| 10C |           | ATTCT_10C_ AAATGGTCT | 9C  | AAATGGTCT_9C  |
| 10C |           | ATTCT_10C_ AAATGGTCT | 9C  | AAATGGTCT_9C  |
| 12C |           | ATTCT_12C_ AAATGGTCT | 10C | AAATGGTCT_10C |
| 12C |           | ATTCT_12C_ AAATGGTCT | 10C | AAATGGTCT_10C |
| 12C |           | ATTCT_12C_ AAATGGTCT | 10C | AAATGGTCT_10C |
| 10C |           | ATTCT_10C_ AAATGGTCT | 9C  | AAATGGTCT_9C  |
| 10C |           | ATTCT_10C_ AAATGGTCT | 9C  | AAATGGTCT_9C  |
| 10C |           | ATTCT_10C_ AAATGGTCT | 9C  | AAATGGTCT_9C  |
| 14C |           | ATTCT_14C_ AAATGGTCT | 9C  | AAATGGTCT_9C  |
| 13C |           | ATTCT_13C_ AAATGGTCT | 10C | AAATGGTCT_10C |
| 14C | 5C-ATCAAA | ATTCT_14C_ AAATGGTCT | 9C  | AAATGGTCT_9C  |
| 14C |           | ATTCT_14C_ AAATGGTCT | 9C  | AAATGGTCT_9C  |
| 10C |           | ATTCT_10C_ AAATGGTCT | 9C  | AAATGGTCT_9C  |
| 13C |           | ATTCT_13C_ AAATGGTCT | 9C  | AAATGGTCT_9C  |
| 11C |           | ATTCT_11C_ AAATGGTCT | 9C  | AAATGGTCT_9C  |
| 13C |           | ATTCT_13C_ AAATGGTCT | 9C  | AAATGGTCT_9C  |
| 13C |           | ATTCT_13C_ AAATGGTCT | 9C  | AAATGGTCT_9C  |
| 14C |           | ATTCT_14C_ AAATGGTCT | 10C | AAATGGTCT_10C |
| 14C |           | ATTCT_14C_ AAATGGTCT | 10C | AAATGGTCT_10C |
| 14C |           | ATTCT_14C_ AAATGGTCT | 10C | AAATGGTCT_10C |
| 13C |           | ATTCT_13C_ AAATGGTCT | 9C  | AAATGGTCT_9C  |
| 14C |           | ATTCT_14C_ AAATGGTCT | 10C | AAATGGTCT_10C |
| 14C |           | ATTCT_14C_ AAATGGTCT | 9C  | AAATGGTCT_9C  |
| 14C |           | ATTCT_14C_ AAATGGTCT | 8C  | AAATGGTCT_8C  |
| 14C |           | ATTCT_14C_ AAATGGTCT | 9C  | AAATGGTCT_9C  |
| 14C |           | ATTCT_14C_ AAATGGTCT | 8C  | AAATGGTCT_8C  |
| 14C |           | ATTCT_14C_ AAATGGTCT | 8C  | AAATGGTCT_8C  |
| 14C |           | ATTCT_14C_ AAATGGTCT | 8C  | AAATGGTCT_8C  |
| 13C |           | ATTCT_13C_ AAATGGTCT | 11C | AAATGGTCT_11C |
| 10C |           | ATTCT_10C_ AAATGGTCT | 12C | AAATGGTCT_12C |
| 14C |           | ATTCT_14C_ AAATGGTCT | 11C | AAATGGTCT_11C |
| 14C |           | ATTCT_14C_ AAATGGTCT | 8C  | AAATGGTCT_8C  |

|     |                         |              |
|-----|-------------------------|--------------|
| 10C | ATTCT_10C_ AAATGGTCT 9C | AAATGGTCT_9C |
| 11C | ATTCT_11C_ AAATGGTCT 9C | AAATGGTCT_9C |
| 11C | ATTCT_11C_ AAATGGTCT 9C | AAATGGTCT_9C |
| 10C | ATTCT_10C_ AAATGGTCT 9C | AAATGGTCT_9C |
| 13C | ATTCT_13C_ AAATGGTCT 9C | AAATGGTCT_9C |
| 11C | ATTCT_11C_ AAATGGTCT 9C | AAATGGTCT_9C |
| 14C | ATTCT_14C_ AAATGGTCT 9C | AAATGGTCT_9C |
| 12C | ATTCT_12C_ AAATGGTCT 9C | AAATGGTCT_9C |
| 11C | ATTCT_11C_ AAATGGTCT 9C | AAATGGTCT_9C |
| 13C | ATTCT_13C_ AAATGGTCT 9C | AAATGGTCT_9C |
| 13C | ATTCT_13C_ AAATGGTCT 9C | AAATGGTCT_9C |

| Serovar | pedersen_code |
|---------|---------------|
| A       | 3b.4.4        |
| A       | 3b.4.4        |
| A       | 3b.7.3        |
| A       | 2b.4.3        |
| A       | 3.5.3         |
| A       | 3.4.4         |
| B       | 3b.8.3        |
| Ba      | 3b.4.3        |
| Ba      | 3b.7.4        |
| Ba      | 2.7.4         |
| A       | 2b.3.2        |
| B       | 3.7.4         |
| B       | 3b.4.3        |
| B       | 3b.5.3        |
| B       | 3b.5.3        |
| Ba      | 2.8.3         |
| A       | 3b.3.2        |
| B       | 3b.4.2        |
| B       | 3b.8.2        |
| B       | 3b.4.3        |
| A       | 3b.6.3        |
| A       | 3b.4.3        |
| B       | 3.5.3         |
| B       | 3.4.3         |
| Ba      | 3b.8.2        |
| A       | 3b.5.3        |
| A       | 3b.8.4        |
| A       | 3b.5.3        |
| A       | 2b.7.5        |
| A       | 3b.5.4        |
| A       | 3b.8.4        |
| A       | 2.8.3         |
| B       | 3b.4.3        |
| B       | 3b.4.3        |
| B       | 3b.4.3        |
| Ba      | 3b.5.3        |
| A       | 3b.8.4        |
| Ba      | 3b.4.3        |
| Ba      | 2b.4.3        |
| B       | 3b.3.2c       |
| A       | 3b.5.4        |
| B       | 3b.5.3        |
| B       | 3b.3.2c       |
| Ba      | 3.3.2c        |
| A       | 3b.7.3        |

|    |         |
|----|---------|
| A  | 3b.4.3  |
| A  | 3b.4.2  |
| A  | 3.5.5   |
| A  | 3b.5.3  |
| A  | 3.4.4   |
| A  | 3b.4.2  |
| A  | 2.8.4   |
| A  | 3.8.2   |
| A  | 3.5.4   |
| A  | 3b.4.2  |
| A  | 1a.3.3  |
| A  | 3b.8.2  |
| A  | 3b.7.2  |
| A  | 1a.5.2  |
| A  | 3b.4.2  |
| A  | 3b.4.2  |
| B  | 3.4.2   |
| B  | 3b.3.2c |
| Ba | 3b.4.3c |
| B  | 2.3.2c  |
| Ba | 3b.3.2c |
| B  | 3b.4.2c |
| B  | 3b.4.3  |
| A  | 3b.4.3  |
| B  | 2.3.2c  |
| B  | 3.4.3c  |
| B  | 3.3.2   |
| Ba | 2.3.2c  |
| B  | 3b.3.2c |
| B  | 3.3.2c  |
| B  | 3b.3.2c |
| B  | 3b.8.3  |
| B  | 3b.3.2c |
| B  | 3b.4.3  |
| A  | 3.8.4   |
| A  | 1a.2.3  |
| A  | 1a.3.3  |
| A  | 1.3.3   |
| B  | 3b.5.3  |
| Ba | 3b.4.3  |
| A  | 3b.5.2  |
| A  | 2.7.3   |
| A  | 3.8.4   |
| A  | 3b.5.8  |
| A  | 3.5.8   |
| B  | 3b.6.2  |

|    |         |
|----|---------|
| Ba | 3b.4.3  |
| A  | 3b.6.2  |
| A  | 3b.5.8  |
| B  | 3b.4.3  |
| A  | 3b.5.8  |
| B  | 2.6.2   |
| B  | 3b.4.3  |
| B  | 3b.4.3  |
| A  | 3b.8.5  |
| A  | 3b.5.3  |
| A  | 3b.8.5  |
| A  | 3b.5.3  |
| A  | 2b.4.2  |
| A  | 3b.8.2  |
| Ba | 3.4.3   |
| B  | 3b.4.3  |
| B  | 3.3.3   |
| Ba | 3.4.3   |
| B  | 3b.4.3c |
| A  | 1a.6.4  |
| A  | 2.8.4   |
| Ba | 3b.4b.3 |
| A  | 3b.5.3  |
| A  | 3b.4.4  |
| B  | 3.4.3   |
| A  | 3b.5.3  |
| B  | 3b.5.3  |
| A  | 3b.4.3  |
| A  | 3.8.3   |
| A  | 3b.4.4  |
| A  | 3b.8.3  |
| B  | 3b.4.2c |
| A  | 3b.7.3  |
| A  | 3b.4.4  |
| B  | 3.4.3   |
| A  | 3b.4.3  |
| A  | 3b.4.3  |
| A  | 3b.4.3  |
| A  | 3.4.3   |
| A  | 3b.5.4  |
| A  | 2.7.3   |
| A  | 3b.8.4  |
| A  | 2b.7.3  |
| A  | 3.7.4   |
| Ba | 3b.4.2  |
| A  | 3.8.3   |

|    |         |
|----|---------|
| A  | 2b.4.3  |
| A  | 3b.8.4  |
| A  | 3b.5.4  |
| A  | 3.5.4   |
| A  | 3b.6.4  |
| A  | 2b.5.5  |
| A  | 2.8.4   |
| A  | 3b.4.3  |
| A  | 3b.8.4  |
| Ba | 3b.5.3  |
| Ba | 3b.5.3  |
| A  | 2b.6.3  |
| A  | 2.4.3   |
| A  | 3b.4.3  |
| A  | 3b.4.3  |
| A  | 3b.4.3  |
| A  | 3b.6.4  |
| A  | 2.6.4   |
| A  | 3b.6.4  |
| A  | 3.4.3   |
| A  | 3b.4.3  |
| A  | 3b.4.3  |
| A  | 3b.8.3  |
| A  | 3b.7.4  |
| Ba | 3b.8a.3 |
| A  | 2.8.3   |
| B  | 3b.4.3  |
| A  | 3b.7.3  |
| A  | 3b.5.3  |
| A  | 3b.7.3  |
| A  | 2.7.3   |
| A  | 3b.8.4  |
| A  | 3b.8.4  |
| A  | 3.8.4   |
| A  | 2.7.3   |
| A  | 3b.8.4  |
| A  | 3b.8.3  |
| A  | 3b.8.2  |
| A  | 3b.8.3  |
| A  | 2b.8.2  |
| A  | 3.8.2   |
| A  | 3.8.2   |
| A  | 2b.7.5  |
| A  | 3b.4.7  |
| A  | 3b.8.5  |
| A  | 3b.8.2  |



|    |        |
|----|--------|
| A  | 3b.4.3 |
| Ba | 3b.5.3 |
| B  | 3b.5.3 |
| B  | 3.4.3  |
| A  | 3.7.3  |
| B  | 3b.5.3 |
| A  | 3.8.3  |
| A  | 3b.6.3 |
| B  | 3.5.3  |
| A  | 3b.7.3 |
| A  | 3b.7.3 |
